# Supplementary material for: A multi-step charging/discharging protocol enables stable cycling for lithium argyrodite-based all-solid-state lithium batteries
Source: Royal Society of Chemistry journal article supplement (doi:10.1039/d4ta06075j), 2024-01-01
Supplement: d4ta06075j1.pdf [file d4ta06075j1.pdf]

Supporting Information

**Multi-step charging/discharging protocol enables stable cycling for lithium  
argyrodite-based all solid-state lithium batteries**

*Pengfei Ren, Xiaodong Wang, Yirui Deng, Zijun Liu, Ruiping Liu\**

*School of Chemical & Environmental Engineering, China University of Mining &  
Technology (Beijing), Beijing, 100083, P. R. China*

## Experimental Procedures

### 1 Synthesis of lithium argyrodite electrolyte

Argyrodite sulfide solid electrolyte was prepared via a mechanical ball milling technique and subsequent heat treatment process. Reagent-grade  $P_2S_5$  (99%, Aladdin),  $Li_2S$  (99.9%, Aladdin),  $LiCl$  (99%, Aladdin) crystalline powders were used as starting materials. The required amount of each starting material was calculated based on the composition  $Li_{7-x}PS_{6-x}Cl_x$  ( $x=1.0, 1.3, 1.5, 1.7$ ) and then sealed in  $ZrO_2$  pot containing 50  $ZrO_2$  balls with a diameter of 5 mm and 20  $ZrO_2$  balls with a diameter of 10 mm in an Argon filled glovebox ( $H_2O, O_2 < 0.01$  ppm) due to the oxygen- and moisture-sensitive of the raw materials. The total weight of the starting mixture was almost 5.0 g. The sealed pot was rotated at a speed of 500 r/min for 10 h with a planetary ball mill. Then the electrolyte precursor was annealed at 460 °C for 10 h, and finally the  $Li_{7-x}PS_{6-x}Cl_x$  was obtained.

### 2 Materials characterization

XRD measurements of the  $Li_{7-x}PS_{6-x}Cl_x$  electrolyte were carried out using Cu  $K\alpha$  radiation ( $\lambda = 1.54178$  Å, RIGAKU D/MAX 2550/PC) from 10° to 80°. SEM and EDS mapping images were obtained with a Hitachi S-8100 scanning electron microscope. XPS was performed using a Thermo Scientific K-Alpha Spectrometer with a monochromatic Al  $K\alpha$  source.

### 3 Electrochemical measurements

The ionic conductivity of  $Li_{7-x}PS_{6-x}Cl_x$  was tested with a Biologic VSP-300 electrochemical workstation from 0.1 Hz to 7 MHz at 25 °C. Solid electrolyte powders were positioned between two stainless steel cylinders of the mold and pressed into electrolyte sheets under a pressure of 300 MPa. Formula 1 was utilized to calculate the ionic conductivity ( $\sigma$ ). R denotes the resistance value, L is the thickness of the electrolyte sheets, and S is the area of the electrolyte sheets. The activation energy ( $E_a$ ) was calculated using the Formula 2, where  $\sigma$  denotes the ionic conductivity, A refers to the prefactor, T stands for the absolute temperature, and kB represents the Boltzmann constant. Formula 3 was used to calculate the electronic conductivity ( $\sigma$ ), with  $\Delta d$  represents the thickness of the electrolyte sheet, S represents the area of the electrolyte sheet, U is the polarization voltage, and I represents the steady-state current.

$$\sigma = L/(R \cdot S) \quad (1)$$

$$\sigma = A/T \cdot e^{-E_a/kBT} \quad (2)$$

$$\sigma = \Delta d/U/(I \cdot S) \quad (3)$$

To evaluate the electrochemical stability of the LPSCl<sub>x</sub>, LPSCl<sub>x</sub> and VGCF were mixed at a weight ratio of 9:1 and manually ground in an agate mortar for 15 min. CV measurement was performed on a LPSCl+VGCF/LPSCl/Li cell under a pressure of 300 MPa using a Biologic VSP-300 at a scan rate of 0.5 mV s<sup>-1</sup> from 2.1 to -0.1 V at room temperature.

For symmetric Li/Li cells, 150 mg of solid electrolyte powder was pressed under 500 MPa, and two pieces of treated lithium foil with a diameter of 12 mm were applied to both sides of the pellet. For all-solid-state NMC/Li cells, a composite cathode consisting of NMC811, solid electrolyte, and vapor-grown carbon fibers (VGCF) at a weight ratio of 75: 25: 2 was prepared by mixing in an agate mortar. The mixed cathode powder, with a loading of 5~6 mg cm<sup>-2</sup>, was then pressed onto one side of the electrolyte pellet under 400 MPa, with the treated lithium foil pressed against the other side. Long-term lithium plating/stripping tests of Li/Li cells at different current densities were conducted using a LAND battery test system at 50 °C, and all-solid-state NMC/Li cells were tested from 2.8 to 4.2 V at 30 or 50 °C with 10 MPa stack pressure.

#### 4 Figures and Tables

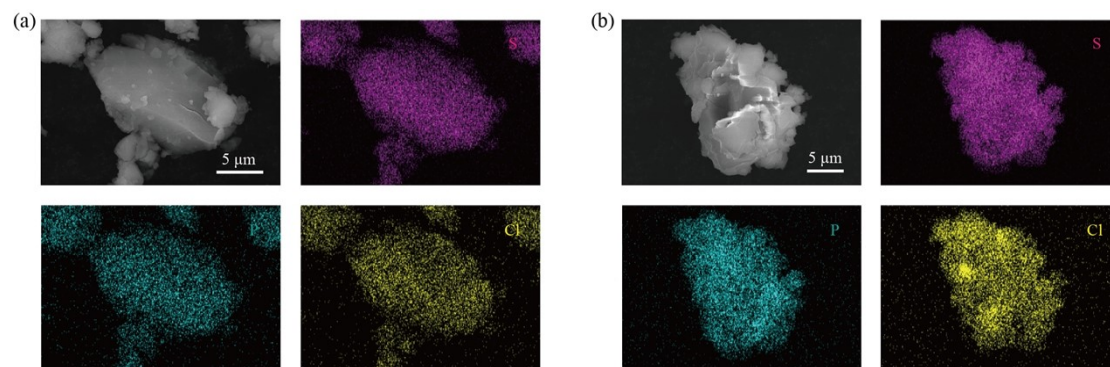

Figure S1. SEM and EDS of (a) LPSC11.0, (b) LPSC11.5 power.

Table S1 Crystallographic data of LPSC11.0 obtained from Rietveld refinement.

| Atom | Wyckoff site | x      | y       | z      |
|------|--------------|--------|---------|--------|
| Li   | 48h          | 0.3187 | 0.0268  | 0.6813 |
| Cl   | 4a           | 0      | 0       | 1      |
| S1   | 4c           | 0.25   | 0.25    | 0.75   |
| P    | 4b           | 0      | 0       | 0.5    |
| S2   | 16e          | 0.1196 | -0.1425 | 0.6196 |

Table S2 Cell parameters of LPSC11.0 obtained from Rietveld refinement.

| x           | y           | z           |
|-------------|-------------|-------------|
| 9.8526 (17) | 9.8526 (17) | 9.8526 (17) |

Table S3 Crystallographic data of LPSC11.5 obtained from Rietveld refinement.

| Atom | Wyckoff site | x      | y       | z      |
|------|--------------|--------|---------|--------|
| Li1  | 48h          | 0.3313 | 0.0076  | 0.6687 |
| Li2  | 24g          | 0      | 0       | 0      |
| Cl1  | 4a           | 0      | 0       | 0      |
| Cl2  | 4c           | 0.5    | 0.5     | 0.5    |
| S1   | 4c           | 0.25   | 0.25    | 0.75   |
| P    | 4b           | 0      | 0       | 0.5    |
| S2   | 16e          | 0.1195 | -0.1195 | 0.6195 |

Table S4 Cell parameters of LPSC11.5 obtained from Rietveld refinement.

| x           | y           | z           |
|-------------|-------------|-------------|
| 9.7833 (16) | 9.7833 (16) | 9.7833 (16) |

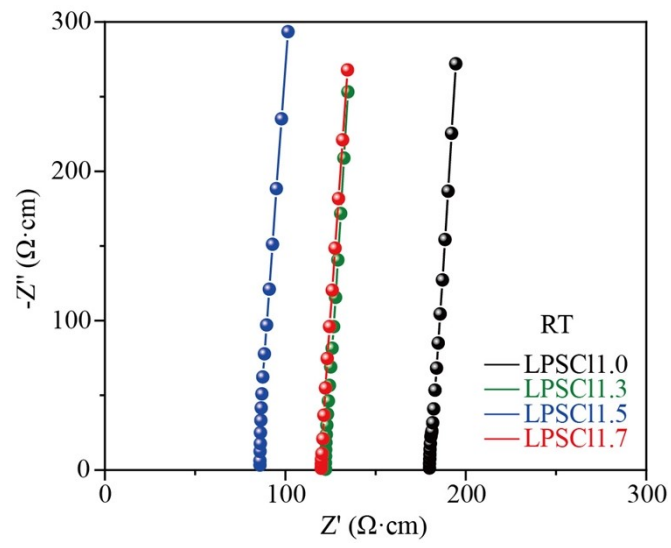

Figure S2. The impedance plots of the  $\text{Li}_{7-x}\text{PS}_{6-x}\text{Cl}_x$  ( $x = 1.0, 1.3, 1.5, \text{ and } 1.7$ ).

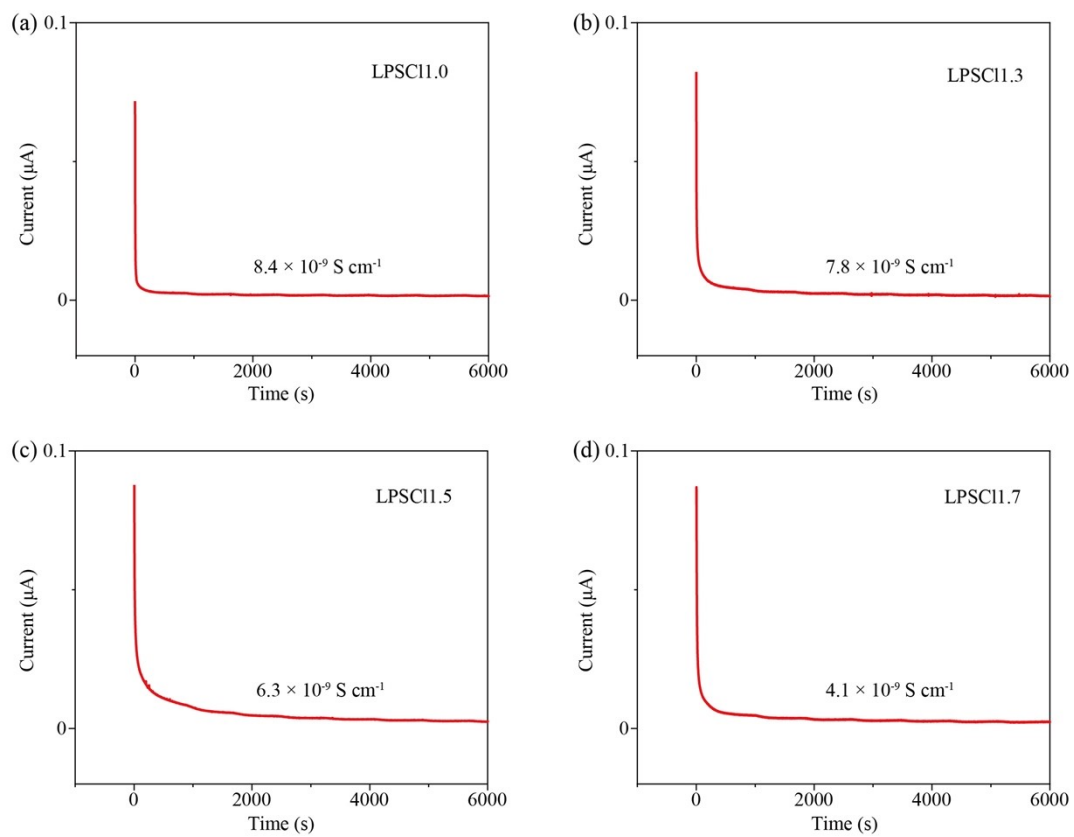

Figure S3. Current–time curve of the  $\text{Li}_{7-x}\text{PS}_{6-x}\text{Cl}_x$  ( $x = 1.0, 1.3, 1.5, \text{ and } 1.7$ ) sandwiched between two pieces of stainless steel.



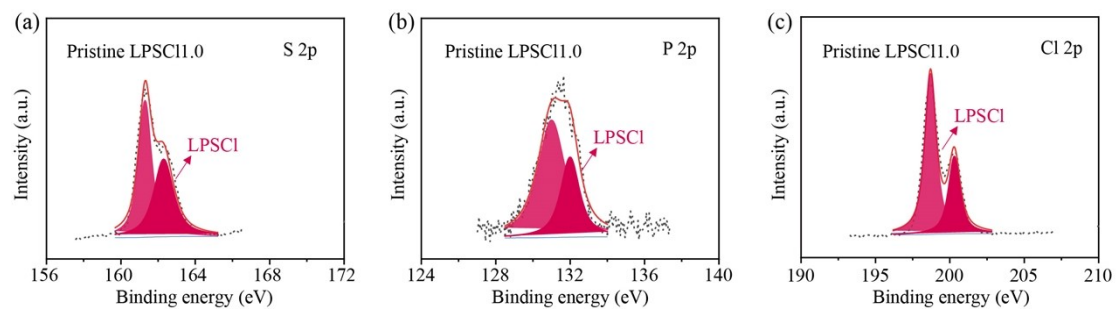

Figure S4. XPS spectra of pristine LPSC11.0.

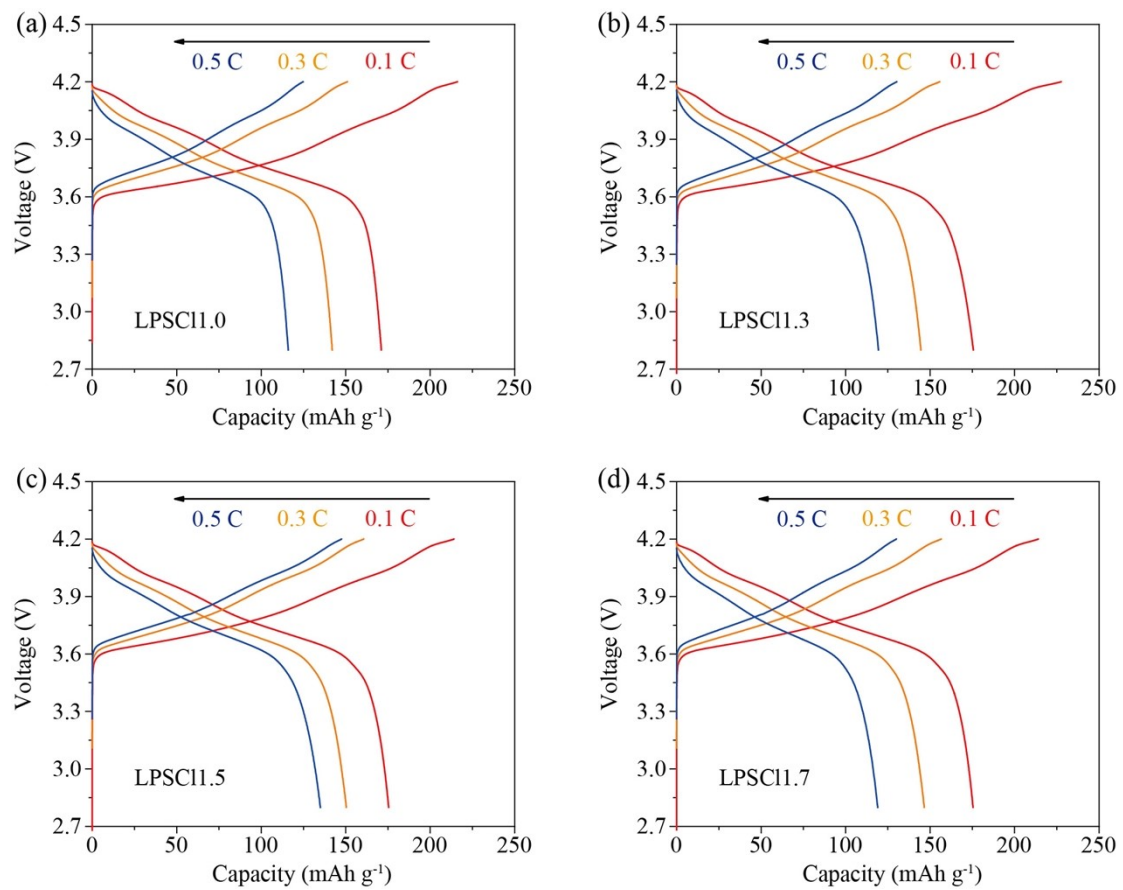

Figure S5 Charge–discharge curves at different rates of the  $\text{Li}_{7-x}\text{PS}_{6-x}\text{Cl}_x$  (x = 1.0, 1.3, 1.5, and 1.7).

Table S5 Test matrix with different charging/discharging protocols.

|       | 2.8–3.6 V | 3.6–3.9 V | 3.9–4.2 V | 4.2–4.0 V | 4.0–3.5 V | 3.5–2.8 V |
|-------|-----------|-----------|-----------|-----------|-----------|-----------|
| CCCD  | 0.3 C     |
| MCCCD | 0.3 C     | 0.5 C     | 0.2 C     | 0.3 C     | 0.5 C     | 0.2 C     |

Table S6 The total time of charging/discharging of MCCCCD and CCCD protocols in the 5th cycle (ICE > 99.9%).

|        | charging | discharging | total |
|--------|----------|-------------|-------|
| CCCD   | 3.1 h    | 3.1 h       | 6.2 h |
| MCCCCD | 2.6 h    | 2.4 h       | 5.0 h |
